# Supplementary material for: TDP-43 Triggers Mitochondrial DNA Release via mPTP to Activate cGAS/STING in ALS
Source: PubMed Central journal article supplement (PMC7599077; doi:10.1016/j.cell.2020.09.020), 2020-10-29
Supplement: mmc1.pdf [file mmc1.pdf]

**Supplemental Information**

**TDP-43 Triggers Mitochondrial DNA Release**

**via mPTP to Activate cGAS/STING in ALS**

**Chien-Hsiung Yu, Sophia Davidson, Cassandra R. Harapas, James B. Hilton, Michael J. Mlodzianoski, Pawat Laohamonthonkul, Cynthia Louis, Ronnie Ren Jie Low, Jonas Moecking, Dominic De Nardo, Katherine R. Balka, Dale J. Calleja, Fiona Moghaddas, Erya Ni, Catriona A. McLean, Andre L. Samson, Shiraz Tyebji, Christopher J. Tonkin, Christopher R. Bye, Bradley J. Turner, Genevieve Pepin, Michael P. Gantier, Kelly L. Rogers, Kate McArthur, Peter J. Crouch, and Seth L. Masters**

**Table S1, Related to Figure 1**  
Demographic characteristics of the patients.

|                            | Amyotrophic Lateral Sclerosis<br>(N = 16) | Multiple Sclerosis<br>(N = 12) |
|----------------------------|-------------------------------------------|--------------------------------|
| Age – yr                   |                                           |                                |
| Median                     | 66.2                                      | 66.5                           |
| Range                      | 53.6 – 79.9                               | 38.5 – 74.5                    |
| Sex – no. (%)              |                                           |                                |
| Male                       | 13 (81.3)                                 | 7 (58.3)                       |
| Female                     | 3 (18.8)                                  | 5 (41.7)                       |
| Post-Mortem Interval - hrs |                                           |                                |
| Median                     | 28.5                                      | 38.25                          |
| Range                      | 7 - 56                                    | 22 - 62                        |
| ALS symptoms – no. (%)     |                                           |                                |
| Bulbar                     | 4 (25.0)                                  |                                |
| Lower Limb                 | 9 (56.3)                                  |                                |
| Upper Limb                 | 6 (37.5)                                  |                                |
| MS symptoms – no. (%)      |                                           |                                |
| Primary Progressive        |                                           | 4 (33.3)                       |
| Secondary Progressive      |                                           | 7 (58.3)                       |
